# Supplementary material
Source: Springer Nature journal article supplement (https://www.springermedizin.de/resource/supplementary/13014_2012_731_MOESM1_ESM.pdf/9634310)

Case 1

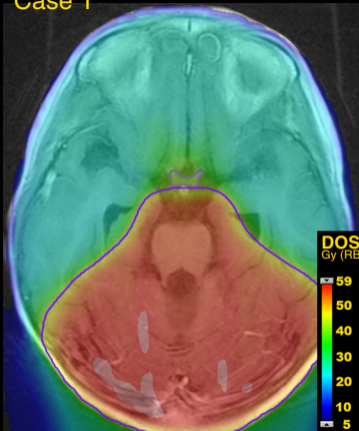

Case 2

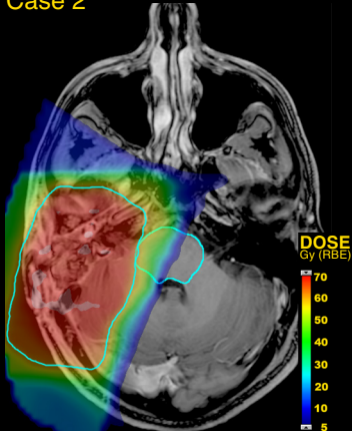

Supplement: MOESM1 [file 9634310]
